# Supplementary material for: Molecular structures of Se(SCH3)2 and Te(SCH3)2 using gas-phase electron diffraction and ab initio and DFT geometry optimisations
Source: Royal Society of Chemistry journal article supplement (doi:10.1039/b505287b), 2005-01-01

## Molecular structures of Se(SCH<sub>3</sub>)<sub>2</sub> and Te(SCH<sub>3</sub>)<sub>2</sub> using gas-phase electron diffraction and *ab initio* and DFT geometry optimisations

Holger Fleischer,<sup>a</sup> Derek A. Wann,<sup>b</sup> Sarah L. Hinchley,<sup>b</sup> Konstantin B. Borisenko,<sup>b</sup> James R. Lewis,<sup>c</sup> Richard J. Mawhorter,<sup>d</sup> Heather E. Robertson<sup>b</sup> and David W. H. Rankin<sup>b</sup>

<sup>a</sup> *Institut für Anorganische Chemie und Analytische Chemie, Johannes Gutenberg Universität Mainz, Duesbergweg 10–14, 55099 Mainz, Germany. E-mail: fleische@uni-mainz.de*

<sup>b</sup> *School of Chemistry, University of Edinburgh, West Mains Road, Edinburgh, EH9 3JJ, UK. E-mail: d.w.h.rankin@ed.ac.uk*

<sup>c</sup> *Cambridge Astronomy Survey Unit, Institute of Astronomy, Madingley Road, Cambridge, CB3 7XT, UK.*

<sup>d</sup> *Department of Physics and Astronomy, Pomona College, 610 North College Avenue, Claremont, CA 91711-6359, USA.*

### Electronic Supplementary Information

**Table S1** Nozzle-to-film distances (mm), weighting functions (nm<sup>-1</sup>), scale factors, correlation parameters and electron wavelengths,  $\lambda$  (pm) used in the electron diffraction studies of Se(SCH<sub>3</sub>)<sub>2</sub> and Te(SCH<sub>3</sub>)<sub>2</sub>.

|                                    | Nozzle-to-film distance <sup>a</sup> | $\Delta s$ | $s_{\min}$ | $sw_1$ | $sw_2$ | $s_{\max}$ | Scale factor <sup>b</sup> | Correlation parameter | $\lambda$ |
|------------------------------------|--------------------------------------|------------|------------|--------|--------|------------|---------------------------|-----------------------|-----------|
| Se(SCH <sub>3</sub> ) <sub>2</sub> | 94.89                                | 2          | 80         | 100    | 292    | 320        | 0.798(22)                 | 0.444                 | 6.020     |
|                                    | 293.46                               | 2          | 20         | 40     | 104    | 120        | 0.736(6)                  | 0.436                 | 6.020     |
| Te(SCH <sub>3</sub> ) <sub>2</sub> | 97.51                                | 4          | 88         | 108    | 220    | 250        | 0.742(22)                 | 0.161                 | 6.020     |
|                                    | 259.65                               | 2          | 20         | 40     | 104    | 120        | 0.644(8)                  | -0.124                | 6.020     |

<sup>a</sup> Determined by reference to the scattering pattern of benzene. <sup>b</sup> Values in parentheses are the estimated standard deviations.

**Table S2** Comparison of  $rC-C$  and various amplitudes of vibration for the fractional weight (frac) and bilinear (lin) methods of digital pixel interpolation for the GED scattering pattern for benzene. <sup>a</sup>

|                | HT-L (frac) | HT-L (lin) | HT-S (frac) | HT-S (lin)  | RT-L (frac) | RT-L (lin)  | RT-S (frac) | RT-S (lin)  |
|----------------|-------------|------------|-------------|-------------|-------------|-------------|-------------|-------------|
| $rC-C$         | 1.3955(2)   | 1.3959(2)  | 1.3991(4)   | 1.3992(4)   | 1.3930(8)   | 1.3937(9)   | 1.3971(5)   | 1.3970(6)   |
| $uC-C$         | 0.0500(10)  | 0.0494(8)  | 0.0429(11)  | 0.0430(12)  | 0.0284(95)  | 0.0469(63)  | 0.0445(14)  | 0.0466(15)  |
| $uC-H$         | 0.0727(23)  | 0.0709(20) | 0.0672(33)  | 0.0706(35)  | 0.0322(263) | 0.0676(150) | 0.0969(73)  | 0.0910(60)  |
| $uC\cdots C_m$ | 0.0643(13)  | 0.0654(11) | 0.0608(11)  | 0.0603(14)  | 0.0569(66)  | 0.0608(68)  | 0.0588(14)  | 0.0598(17)  |
| $uC\cdots C_p$ | 0.0642(19)  | 0.0676(18) | 0.0707(23)  | 0.0708(32)  | 0.0493(119) | 0.0550(118) | 0.0659(25)  | 0.0647(33)  |
| $uC\cdots H_o$ | 0.1067(23)  | 0.1078(20) | 0.0946(36)  | 0.0895(42)  | 0.0951(91)  | 0.0892(98)  | 0.1053(44)  | 0.1052(55)  |
| $uC\cdots H_m$ | 0.1141(23)  | 0.1139(22) | 0.1181(56)  | 0.1139(82)  | 0.1292(92)  | 0.1329(104) | 0.1169(52)  | 0.1280(83)  |
| $uC\cdots H_p$ | 0.1105(47)  | 0.1146(48) | 0.1093(102) | 0.0933(139) | 0.1275(184) | 0.1320(216) | 0.0925(85)  | 0.0891(124) |
| $R_G$          | 0.0120      | 0.0110     | 0.0612      | 0.0693      | 0.0442      | 0.0456      | 0.0690      | 0.0777      |

<sup>a</sup> HT and RT refer to data collected at high temperature and room temperature respectively. L denotes the use of the long nozzle-to-camera distance, small angle scattering and higher signal-to-noise ratio (S/N). S denotes the use of the short nozzle-to-camera distance, large angle scattering and lower S/N. Frac refers to the assignment of fractional weight to pixels on boundaries of circular  $s$ -value bins and lin to a bilinear interpolation to evaluate data at fixed grid of points.

The following notes explain the contents of Table S2 in more detail.

Fractional weight method provides a significantly better fit to data for 3 of the 4 cases (exception HT-L). The method uses data from each pixel, all with the same weight. It requires more computation than the interpolation method and is therefore slower, though not prohibitively so.

Bilinear interpolation method chooses a circular grid of points spaced in 1 degree intervals (same method as Joyce-Loebl densitometer), so points are closer together at small scattering angles with better S/N. Hence this small angle data is used more often, giving it more weight. The interpolation algorithms are fast and so the computations are quicker than with the fractional weight method.

**Table S3** Calculated [HF/6-31G(d)] coordinates for Se(SCH<sub>3</sub>)<sub>2</sub>.

| Atom  | $g^+g^+$ |          |          | $g^+g^-$ |          |          |
|-------|----------|----------|----------|----------|----------|----------|
|       | <i>x</i> | <i>y</i> | <i>z</i> | <i>x</i> | <i>y</i> | <i>z</i> |
| Se(1) | 0.0000   | 0.0000   | 0.9131   | 0.7851   | -0.5180  | 0.0000   |
| S(2)  | 0.0000   | 1.7226   | -0.4399  | -0.5327  | -0.3343  | 1.7392   |
| S(3)  | 0.0000   | -1.7226  | -0.4399  | -0.5327  | -0.3343  | -1.7392  |
| C(4)  | 1.7525   | 1.8317   | -0.9083  | -0.5327  | 1.4560   | 2.0579   |
| C(5)  | -1.7525  | -1.8317  | -0.9083  | -0.5327  | 1.4560   | -2.0579  |
| H(6)  | 1.8519   | 2.7117   | -1.5315  | -1.0023  | 1.5946   | 3.0239   |
| H(7)  | 2.0494   | 0.9590   | -1.4722  | -1.1035  | 1.9863   | 1.3094   |
| H(8)  | 2.3749   | 1.9370   | -0.0317  | 0.4772   | 1.8383   | 2.0932   |
| H(9)  | -1.8519  | -2.7117  | -1.5315  | -1.0023  | 1.5946   | -3.0239  |
| H(10) | -2.0494  | -0.9590  | -1.4722  | -1.1035  | 1.9863   | -1.3094  |
| H(11) | -2.3749  | -1.9370  | -0.0317  | 0.4772   | 1.8383   | -2.0932  |

Sum of electronic and zero-point energies = -3271.7673 Hartree for  $g^+g^+$

Sum of electronic and zero-point energies = -3271.7648 Hartree for  $g^+g^-$

**Table S4** Calculated [B3LYP/6-31G(d)] coordinates for Se(SCH<sub>3</sub>)<sub>2</sub>.

| Atom  | $g^+g^+$ |          |          | $g^+g^-$ |          |          |
|-------|----------|----------|----------|----------|----------|----------|
|       | <i>x</i> | <i>y</i> | <i>z</i> | <i>x</i> | <i>y</i> | <i>z</i> |
| Se(1) | 0.0000   | 0.0000   | 0.9035   | 0.7786   | -0.5343  | 0.0000   |
| S(2)  | 0.0000   | 1.7671   | -0.4424  | -0.5284  | -0.3323  | 1.7835   |
| S(3)  | 0.0000   | -1.7671  | -0.4424  | -0.5284  | -0.3323  | -1.7835  |
| C(4)  | 1.7767   | 1.9032   | -0.8869  | -0.5284  | 1.4822   | 2.0796   |
| C(5)  | -1.7767  | -1.9032  | -0.8869  | -0.5284  | 1.4822   | -2.0796  |
| H(6)  | 1.8762   | 2.8084   | -1.4941  | -0.9545  | 1.6326   | 3.0765   |
| H(7)  | 2.0893   | 1.0370   | -1.4744  | -1.1477  | 1.9998   | 1.3438   |
| H(8)  | 2.3931   | 1.9935   | 0.0098   | 0.4901   | 1.8749   | 2.0572   |
| H(9)  | -1.8762  | -2.8084  | -1.4941  | -0.9545  | 1.6326   | -3.0765  |
| H(10) | -2.0893  | -1.0370  | -1.4744  | -1.1477  | 1.9998   | -1.3438  |
| H(11) | -2.3931  | -1.9935  | 0.0098   | 0.4901   | 1.8749   | -2.0572  |

Sum of electronic and zero-point energies = -3275.5371 Hartree for  $g^+g^+$

Sum of electronic and zero-point energies = -3275.5353 Hartree for  $g^+g^-$

**Table S5** Calculated [MP2/6-31G(d)] coordinates for Se(SCH<sub>3</sub>)<sub>2</sub>.

| Atom  | $g^+g^+$ |          |          | $g^+g^-$ |          |          |
|-------|----------|----------|----------|----------|----------|----------|
|       | <i>x</i> | <i>y</i> | <i>z</i> | <i>x</i> | <i>y</i> | <i>z</i> |
| Se(1) | 0.0000   | 0.0000   | 0.9232   | 0.7822   | -0.5325  | 0.0000   |
| S(2)  | 0.0000   | 1.7256   | -0.4402  | -0.5311  | -0.3297  | 1.7499   |
| S(3)  | 0.0000   | -1.7256  | -0.4402  | -0.5311  | -0.3297  | -1.7499  |
| C(4)  | 1.7501   | 1.7597   | -0.9251  | -0.5311  | 1.4725   | 1.9940   |
| C(5)  | -1.7501  | -1.7597  | -0.9251  | -0.5311  | 1.4725   | -1.9940  |
| H(6)  | 1.8847   | 2.6288   | -1.5742  | -0.9423  | 1.6575   | 2.9898   |
| H(7)  | 2.0079   | 0.8549   | -1.4780  | -1.1568  | 1.9722   | 1.2534   |
| H(8)  | 2.3907   | 1.8559   | -0.0479  | 0.4858   | 1.8638   | 1.9460   |
| H(9)  | -1.8847  | -2.6288  | -1.5742  | -0.9423  | 1.6575   | -2.9898  |
| H(10) | -2.0079  | -0.8549  | -1.4780  | -1.1568  | 1.9722   | -1.2534  |
| H(11) | -2.3907  | -1.8559  | -0.0479  | 0.4858   | 1.8638   | -1.9460  |

Sum of electronic and zero-point energies = -3272.3901 Hartree for  $g^+g^+$

Sum of electronic and zero-point energies = -3272.3878 Hartree for  $g^+g^-$

**Table S6** Calculated [MP2/LanL2DZ(d)] coordinates for Se(SCH<sub>3</sub>)<sub>2</sub>.

| Atom  | $g^+g^+$ |          |          | $g^+g^-$ |          |          |
|-------|----------|----------|----------|----------|----------|----------|
|       | <i>x</i> | <i>y</i> | <i>z</i> | <i>x</i> | <i>y</i> | <i>z</i> |
| Se(1) | 0.0000   | 0.0000   | 1.4507   | 1.1046   | -1.1369  | 0.0000   |
| S(2)  | 0.0000   | 1.7242   | 0.0700   | -0.2184  | -0.9287  | 1.7553   |
| S(3)  | 0.0000   | -1.7242  | 0.0700   | -0.2184  | -0.9287  | -1.7553  |
| C(4)  | 1.7391   | 1.7273   | -0.4886  | -0.2184  | 0.8792   | 2.0339   |
| C(5)  | -1.7391  | -1.7273  | -0.4886  | -0.2184  | 0.8792   | -2.0339  |
| H(6)  | 1.8402   | 2.5629   | -1.1938  | -0.7258  | 1.0416   | 2.9942   |
| H(7)  | 1.9719   | 0.7879   | -1.0032  | -0.7713  | 1.4006   | 1.2452   |
| H(8)  | 2.4202   | 1.8761   | 0.3561   | 0.8044   | 1.2658   | 2.0966   |
| H(9)  | -1.8402  | -2.5629  | -1.1938  | -0.7258  | 1.0416   | -2.9942  |
| H(10) | -1.9719  | -0.7879  | -1.0032  | -0.7713  | 1.4006   | -1.2452  |
| H(11) | -2.4202  | -1.8761  | 0.3561   | 0.8044   | 1.2658   | -2.0966  |

Sum of electronic and zero-point energies = -108.6376 Hartree for  $g^+g^+$

Sum of electronic and zero-point energies = -108.6348 Hartree for  $g^+g^-$

**Table S7** Calculated [HF/3-21G(d)] coordinates for Te(SCH<sub>3</sub>)<sub>2</sub>.

| Atom  | $g^+g^+$ |          |          | $g^+g^-$ |          |          |
|-------|----------|----------|----------|----------|----------|----------|
|       | <i>x</i> | <i>y</i> | <i>z</i> | <i>x</i> | <i>y</i> | <i>z</i> |
| Te(1) | 0.0000   | 0.0000   | 0.8631   | 0.7249   | -0.4791  | 0.0000   |
| S(2)  | 0.0000   | 1.8461   | -0.6751  | -0.7522  | -0.1929  | 1.8735   |
| S(3)  | 0.0000   | -1.8461  | -0.6751  | -0.7522  | -0.1929  | -1.8735  |
| C(4)  | 1.7324   | 1.9249   | -1.2512  | -0.7522  | 1.6096   | 2.1794   |
| C(5)  | -1.7324  | -1.9249  | -1.2512  | -0.7522  | 1.6096   | -2.1794  |
| H(6)  | 1.7927   | 2.7595   | -1.9377  | -1.3144  | 1.7654   | 3.0912   |
| H(7)  | 1.9986   | 1.0167   | -1.7707  | -1.2369  | 2.1370   | 1.3722   |
| H(8)  | 2.4062   | 2.0910   | -0.4245  | 0.2523   | 1.9812   | 2.3135   |
| H(9)  | -1.7927  | -2.7595  | -1.9377  | -1.3144  | 1.7654   | -3.0912  |
| H(10) | -1.9986  | -1.0167  | -1.7707  | -1.2369  | 2.1370   | -1.3722  |
| H(11) | -2.4062  | -2.0910  | -0.4245  | 0.2523   | 1.9812   | -2.3135  |

Sum of electronic and zero-point energies = -7453.3400 Hartree for  $g^+g^+$

Sum of electronic and zero-point energies = -7453.3381 Hartree for  $g^+g^-$

**Table S8** Calculated [HF/LanL2DZ(d)] coordinates for Te(SCH<sub>3</sub>)<sub>2</sub>.

| Atom  | $g^+g^+$ |          |          | $g^+g^-$ |          |          |
|-------|----------|----------|----------|----------|----------|----------|
|       | <i>x</i> | <i>y</i> | <i>z</i> | <i>x</i> | <i>y</i> | <i>z</i> |
| Te(1) | 0.0000   | 0.0000   | 1.5593   | 0.7158   | -0.4677  | 0.0000   |
| S(2)  | 0.0000   | 1.8457   | 0.0463   | -0.7426  | -0.2038  | 1.8714   |
| S(3)  | 0.0000   | -1.8457  | 0.0463   | -0.7426  | -0.2038  | -1.8714  |
| C(4)  | 1.7402   | 1.9488   | -0.5096  | -0.7426  | 1.5969   | 2.2006   |
| C(5)  | -1.7402  | -1.9488  | -0.5096  | -0.7426  | 1.5969   | -2.2006  |
| H(6)  | 1.7925   | 2.7941   | -1.1857  | -1.3074  | 1.7346   | 3.1152   |
| H(7)  | 2.0233   | 1.0497   | -1.0384  | -1.2281  | 2.1375   | 1.4005   |
| H(8)  | 2.4050   | 2.1152   | 0.3261   | 0.2622   | 1.9687   | 2.3436   |
| H(9)  | -1.7925  | -2.7941  | -1.1857  | -1.3074  | 1.7346   | -3.1152  |
| H(10) | -2.0233  | -1.0497  | -1.0384  | -1.2281  | 2.1375   | -1.4005  |
| H(11) | -2.4050  | -2.1152  | 0.3261   | 0.2622   | 1.9687   | -2.3436  |

Sum of electronic and zero-point energies = -106.8570 Hartree for  $g^+g^+$

Sum of electronic and zero-point energies = -106.8547 Hartree for  $g^+g^-$

**Table S9** Calculated [B3LYP/LanL2DZ(d)] coordinates for Te(SCH<sub>3</sub>)<sub>2</sub>.

| Atom  | $g^+g^+$ |          |          | $g^+g^-$ |          |          |
|-------|----------|----------|----------|----------|----------|----------|
|       | <i>x</i> | <i>y</i> | <i>z</i> | <i>x</i> | <i>y</i> | <i>z</i> |
| Te(1) | 0.0000   | 0.0000   | 0.8306   | 0.7096   | -0.4695  | 0.0000   |
| S(2)  | 0.0000   | 1.9006   | -0.6669  | -0.7362  | -0.2093  | 1.9239   |
| S(3)  | 0.0000   | -1.9006  | -0.6669  | -0.7362  | -0.2093  | -1.9239  |
| C(4)  | 1.7702   | 2.0597   | -1.1756  | -0.7362  | 1.6106   | 2.2542   |
| C(5)  | -1.7702  | -2.0597  | -1.1756  | -0.7362  | 1.6106   | -2.2542  |
| H(6)  | 1.8208   | 2.9385   | -1.8298  | -1.2597  | 1.7446   | 3.2087   |
| H(7)  | 2.0894   | 1.1749   | -1.7334  | -1.2762  | 2.1502   | 1.4710   |
| H(8)  | 2.4177   | 2.2147   | -0.3082  | 0.2823   | 1.9977   | 2.3453   |
| H(9)  | -1.8208  | -2.9385  | -1.8298  | -1.2597  | 1.7446   | -3.2087  |
| H(10) | -2.0894  | -1.1749  | -1.7334  | -1.2762  | 2.1502   | -1.4710  |
| H(11) | -2.4177  | -2.2147  | -0.3082  | 0.2823   | 1.9977   | -2.3453  |

Sum of electronic and zero-point energies = -108.0849 Hartree for  $g^+g^+$

Sum of electronic and zero-point energies = -108.0833 Hartree for  $g^+g^-$

**Table S10** Calculated [MP2/LanL2DZ(d)] coordinates for Te(SCH<sub>3</sub>)<sub>2</sub>.

| Atom  | $g^+g^+$ |          |          | $g^+g^-$ |          |          |
|-------|----------|----------|----------|----------|----------|----------|
|       | <i>x</i> | <i>y</i> | <i>z</i> | <i>x</i> | <i>y</i> | <i>z</i> |
| Te(1) | 0.0000   | 0.0000   | 1.5906   | 0.7151   | -0.4788  | 0.0000   |
| S(2)  | 0.0000   | 1.8374   | 0.0571   | -0.7419  | -0.1993  | 1.8775   |
| S(3)  | 0.0000   | -1.8374  | 0.0571   | -0.7419  | -0.1993  | -1.8775  |
| C(4)  | 1.7375   | 1.8447   | -0.5247  | -0.7419  | 1.6180   | 2.1307   |
| C(5)  | -1.7375  | -1.8447  | -0.5247  | -0.7419  | 1.6180   | -2.1307  |
| H(6)  | 1.8205   | 2.6722   | -1.2415  | -1.2855  | 1.7955   | 3.0680   |
| H(7)  | 1.9745   | 0.9021   | -1.0309  | -1.2623  | 2.1283   | 1.3132   |
| H(8)  | 2.4312   | 2.0111   | 0.3063   | 0.2780   | 2.0051   | 2.2260   |
| H(9)  | -1.8205  | -2.6722  | -1.2415  | -1.2855  | 1.7955   | -3.0680  |
| H(10) | -1.9745  | -0.9021  | -1.0309  | -1.2623  | 2.1283   | -1.3132  |
| H(11) | -2.4312  | -2.0111  | 0.3063   | 0.2780   | 2.0051   | -2.2260  |

Sum of electronic and zero-point energies = -107.4617 Hartree for  $g^+g^+$

Sum of electronic and zero-point energies = -107.4596 Hartree for  $g^+g^-$

**Table S11** Least-squares correlation matrix ( $\times 100$ ) for  $\text{Se}(\text{SCH}_3)_2$ .<sup>a</sup>

|       | $u_8$ | $k_2$ |
|-------|-------|-------|
| $p_2$ | 51    | 57    |
| $u_7$ | 71    | 76    |
| $u_8$ |       | 93    |

<sup>a</sup> Only elements with absolute values  $> 50\%$  are shown;  $k_2$  is a scale factor.

**Table S12** Least-squares correlation matrix ( $\times 100$ ) for  $\text{Te}(\text{SCH}_3)_2$ .<sup>a</sup>

|       | $p_5$ | $p_6$ | $k_1$ | $k_2$ |
|-------|-------|-------|-------|-------|
| $p_1$ |       | -63   |       |       |
| $p_4$ | 63    |       |       |       |
| $u_8$ |       |       | 62    | 72    |

<sup>a</sup> Only elements with absolute values  $> 50\%$  are shown;  $k_1$  and  $k_2$  are scale factors.

**Figure S1** Experimental and difference (experimental–theoretical) molecular-scattering intensities for  $\text{Se}(\text{SCH}_3)_2$ .

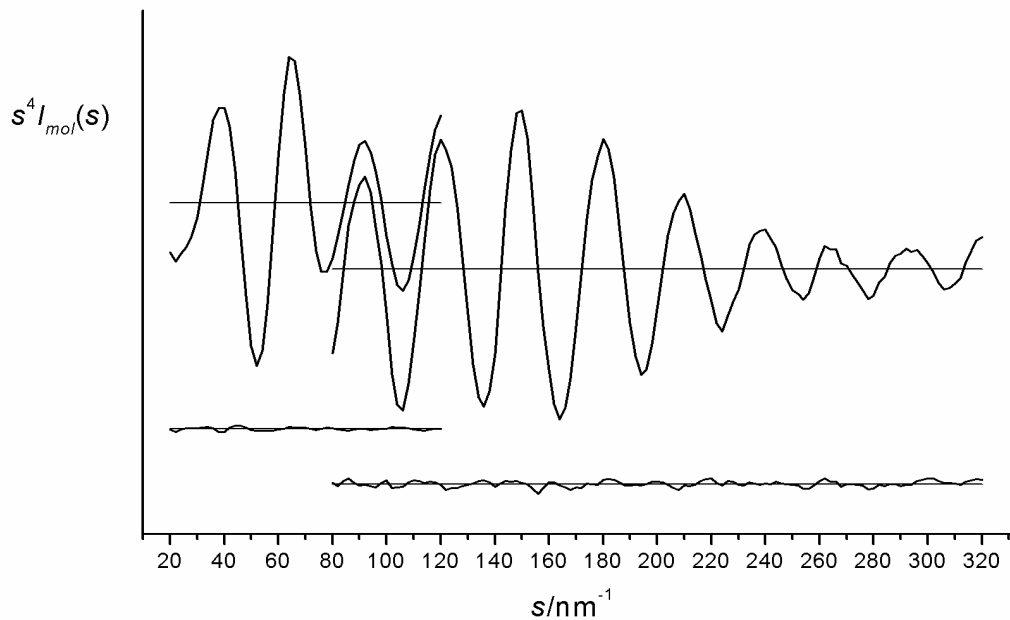

**Figure S2** Experimental and difference (experimental–theoretical) molecular-scattering intensities for  $\text{Te}(\text{SCH}_3)_2$ .

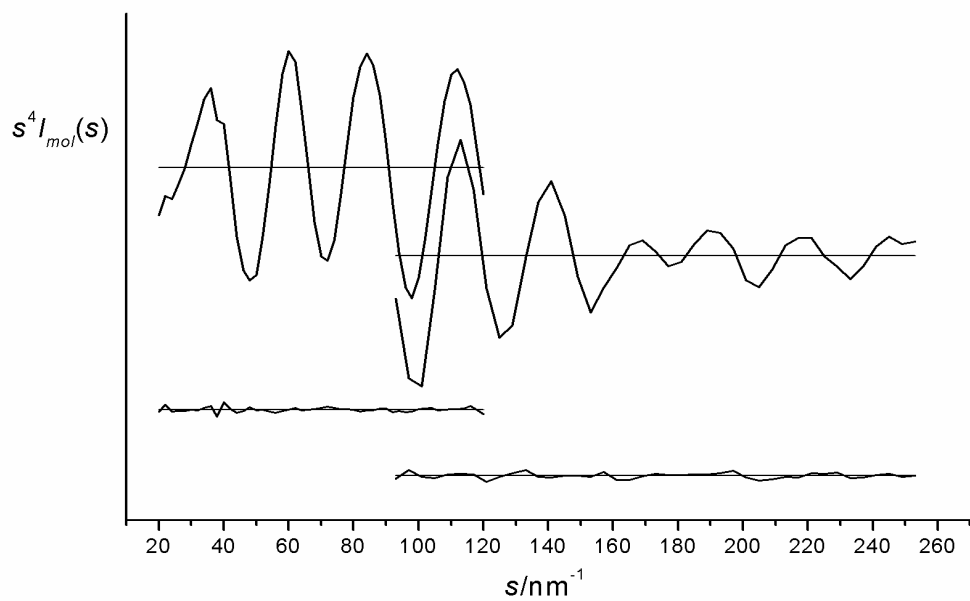

Supplement: b505287b.pdf [file b505287b.pdf]
